# Supplementary material for: The different roles of a cationic gold(i) complex in catalysing hydroarylation of alkynes and alkenes with a heterocycle
Source: Royal Society of Chemistry journal article supplement (doi:10.1039/c6cc04370d), 2016-01-01
Supplement: c6cc04370d1.pdf [file c6cc04370d1.pdf]

## “Supporting Information”

### Different roles of a cationic gold(I) complex in catalysing hydroarylation of alkynes and alkenes with a heterocycle

Tahmineh Mehrabi,<sup>a</sup> Alireza Ariafard<sup>a,b\*</sup>

<sup>†</sup>Department of Chemistry, Faculty of Science, Central Tehran Branch, Islamic Azad University, Shahrak Gharb, Tehran, Iran

<sup>‡</sup> School of Physical Sciences (Chemistry), University of Tasmania, Private Bag 75, Hobart TAS 7001, Australia

#### Corresponding Author

\*E-mail for A.A.: [alirezaa@utas.edu.au](mailto:alirezaa@utas.edu.au)

#### Contents:

**Table S1.** Cartesian coordinates and total energies for all of the calculated structures (page S2)

**Scheme S1.** Comparison of the stability of the carbocation 13 for different heterocycles (page S31)

**Computational details** (page S32)

**Table S1.** Cartesian coordinates and total energies for all of the calculated structures.

**5**

E (M06/BS1) = -806.319424 au

H(M06/BS1) = -806.105756 au

G(M06/BS1) = -806.163867 au

E(M06/BS2//M06/BS1) = -806.810764 au

E(M06-D3/BS2//M06/BS1) = -806.813432 au

|    |             |             |             |
|----|-------------|-------------|-------------|
| Au | 0.11906700  | -0.27544300 | 0.02984700  |
| P  | -2.15084500 | 0.23425100  | -0.02772500 |
| C  | -2.96693200 | -0.27956400 | -1.57143500 |
| H  | -4.03121000 | -0.01309800 | -1.53979600 |
| H  | -2.49189500 | 0.22050700  | -2.42254000 |
| H  | -2.86750600 | -1.36284600 | -1.69996000 |
| C  | -3.10374700 | -0.56002500 | 1.30390800  |
| H  | -2.72463400 | -0.22816100 | 2.27672100  |
| H  | -4.16450900 | -0.29242200 | 1.21646000  |
| H  | -2.99718100 | -1.64818800 | 1.23714400  |
| C  | -2.50808400 | 2.01282200  | 0.12692600  |
| H  | -3.59207900 | 2.18016700  | 0.08587000  |
| H  | -2.11843100 | 2.38815000  | 1.07939100  |
| H  | -2.02490900 | 2.55869200  | -0.69073000 |
| C  | 2.29119900  | -0.90628700 | -0.03845500 |
| C  | 2.57949200  | -0.11186700 | 1.09006700  |
| H  | 2.14096700  | -1.98383500 | -0.00437100 |
| C  | 2.74302600  | -0.15148700 | -1.18502800 |
| N  | 3.12983500  | 1.03986900  | 0.65266900  |
| C  | 3.23414400  | 1.03704100  | -0.72240400 |
| H  | 2.70712200  | -0.47430100 | -2.21789900 |
| H  | 3.64111700  | 1.89189700  | -1.24579700 |
| H  | 3.38407500  | 1.81845900  | 1.24864000  |
| H  | 2.47203300  | -0.33170800 | 2.14471700  |

**CH<sub>3</sub>CCH**

E (M06/BS1) = -116.552729 au

H(M06/BS1) = -116.492289 au

G(M06/BS1) = -116.521318 au

E(M06/BS2//M06/BS1) = -116.606770 au

E(M06-D3/BS2//M06/BS1) = -116.606917 au

|   |             |             |             |
|---|-------------|-------------|-------------|
| C | -0.21585500 | -0.00075300 | 0.00048400  |
| C | -1.42431500 | 0.00020100  | -0.00020000 |
| C | 1.23760500  | 0.00030300  | -0.00015900 |
| H | 1.63584200  | 0.99526100  | -0.23483000 |
| H | 1.63699800  | -0.29396800 | 0.97858800  |
| H | 1.63673200  | -0.70051900 | -0.74429700 |
| H | -2.49417900 | 0.00072500  | -0.00020600 |

**TS<sub>5-6</sub>**

E (M06/BS1) = -922.873042 au  
 H(M06/BS1) = -922.598036 au  
 G(M06/BS1) = -922.665864 au  
 E(M06/BS2//M06/BS1) = -923.412805 au  
 E(M06-D3/BS2//M06/BS1) = -923.4181806 au

|    |             |             |             |
|----|-------------|-------------|-------------|
| Au | 0.15886700  | -0.33541700 | -0.22005600 |
| P  | -2.13712500 | -0.18007200 | 0.15132200  |
| C  | -2.95623800 | 1.01421000  | -0.95512000 |
| H  | -4.02737700 | 1.07413600  | -0.72223400 |
| H  | -2.50000700 | 2.00230200  | -0.82342800 |
| H  | -2.82840200 | 0.70452200  | -1.99815500 |
| C  | -3.09593400 | -1.71851100 | -0.02843300 |
| H  | -2.72422500 | -2.46785000 | 0.67903400  |
| H  | -4.15829400 | -1.52574100 | 0.17027500  |
| H  | -2.98238700 | -2.10985900 | -1.04529400 |
| C  | -2.51978500 | 0.41783900  | 1.82994000  |
| H  | -3.60545800 | 0.51317900  | 1.96197500  |
| H  | -2.12304500 | -0.28306800 | 2.57262400  |
| H  | -2.04521500 | 1.39436800  | 1.98152900  |
| C  | 2.12138500  | -2.22291900 | -0.02392700 |
| C  | 1.78128400  | -2.08076100 | -1.18481900 |
| H  | 1.57704700  | -2.06414300 | -2.23771500 |
| C  | 2.52390500  | -2.37362300 | 1.36300800  |
| H  | 1.67070800  | -2.65868300 | 1.99052900  |
| H  | 3.29255300  | -3.14980500 | 1.45870700  |
| H  | 2.93982600  | -1.43693400 | 1.75644200  |
| C  | 2.10631500  | 1.28904500  | -0.12352700 |
| C  | 1.45068400  | 2.07888700  | -1.06617500 |
| H  | 2.87083700  | 0.55190600  | -0.34738400 |
| C  | 1.76903400  | 1.81589600  | 1.16618500  |
| N  | 0.75298300  | 3.03310400  | -0.39031700 |
| C  | 0.93008400  | 2.88450600  | 0.96194800  |
| H  | 2.12559300  | 1.45568800  | 2.12416400  |
| H  | 0.44273600  | 3.54975500  | 1.66286700  |
| H  | 0.16408100  | 3.73227800  | -0.82369400 |
| H  | 1.48211000  | 2.05786400  | -2.14792600 |

## 6

E (M06/BS1) = -712.859295 au  
 H(M06/BS1) = -712.674109 au  
 G(M06/BS1) = -712.729327 au  
 E(M06/BS2//M06/BS1) = -713.320184 au  
 E(M06-D3/BS2//M06/BS1) = -713.32239 au

|    |             |             |             |
|----|-------------|-------------|-------------|
| Au | -0.42771600 | -0.22457700 | -0.00066700 |
| P  | 1.86638500  | 0.18434200  | 0.00022400  |
| C  | 2.28725800  | 1.92735300  | -0.30392500 |
| H  | 3.37754100  | 2.05163600  | -0.28677100 |
| H  | 1.90091100  | 2.23798600  | -1.28058400 |
| H  | 1.83718200  | 2.55720800  | 0.47085400  |

|   |             |             |             |
|---|-------------|-------------|-------------|
| C | 2.66773700  | -0.24082900 | 1.57678500  |
| H | 2.52373200  | -1.30569600 | 1.78953700  |
| H | 3.74180700  | -0.02239500 | 1.51958000  |
| H | 2.22010900  | 0.34410200  | 2.38743800  |
| C | 2.75649000  | -0.76283200 | -1.27169700 |
| H | 3.82887700  | -0.53494400 | -1.22266400 |
| H | 2.60458000  | -1.83517600 | -1.10817100 |
| H | 2.37349700  | -0.49960300 | -2.26356000 |
| C | -2.85434900 | 0.10402000  | 0.00201700  |
| C | -2.51800200 | -1.07779100 | 0.00456200  |
| H | -2.52568900 | -2.15311200 | 0.00770400  |
| C | -3.30329800 | 1.48385400  | -0.00094500 |
| H | -4.40008200 | 1.50275000  | 0.00717500  |
| H | -2.94524700 | 2.01963200  | 0.88531800  |
| H | -2.95843700 | 2.01137700  | -0.89731700 |

pyrrole

E (M06/BS1) = -210.005274 au

H(M06/BS1) = -209.918050 au

G(M06/BS1) = -209.949362 au

E(M06/BS2//M06/BS1) = -210.092827 au

E(M06-D3/BS2//M06/BS1) = -210.093194 au

|   |             |             |             |
|---|-------------|-------------|-------------|
| C | -0.98029600 | 0.71326800  | 0.00008400  |
| C | 0.33378900  | 1.12039900  | -0.00012100 |
| H | -1.84610400 | 1.36574900  | 0.00016100  |
| C | -0.98351400 | -0.70880900 | -0.00002000 |
| N | 1.11949700  | -0.00251400 | 0.00007500  |
| C | 0.32863700  | -1.12192400 | -0.00005600 |
| H | -1.85233900 | -1.35735700 | -0.00001500 |
| H | 0.76560300  | -2.11257900 | -0.00008700 |
| H | 2.12927300  | -0.00482800 | 0.00029600  |
| H | 0.77539600  | 2.10900400  | -0.00020500 |

TS<sub>6-7</sub>

E (M06/BS1) = -922.8632244 au

H(M06/BS1) = -922.588399 au

G(M06/BS1) = -922.657023 au

E(M06/BS2//M06/BS1) = -923.4009972 au

E(M06-D3/BS2//M06/BS1) = -923.4051979 au

|    |             |             |             |
|----|-------------|-------------|-------------|
| C  | 2.04732600  | 0.15047500  | -0.12581500 |
| C  | 1.21665100  | -0.82100700 | -0.18125300 |
| H  | 1.44259000  | -1.87786900 | -0.29579000 |
| C  | 2.35751700  | 1.56281000  | 0.03452100  |
| H  | 2.54704800  | 2.05646000  | -0.92594200 |
| H  | 1.50008000  | 2.04875500  | 0.51911300  |
| H  | 3.22914700  | 1.71518100  | 0.68666700  |
| Au | -0.81302600 | -0.26676600 | -0.06376500 |
| P  | -3.10216200 | 0.24994700  | 0.08249000  |

|   |             |             |             |
|---|-------------|-------------|-------------|
| C | -4.08383900 | -0.30983800 | -1.34745500 |
| H | -5.13892900 | -0.04127200 | -1.20721700 |
| H | -3.70808600 | 0.16030500  | -2.26282600 |
| H | -3.99723400 | -1.39699200 | -1.45139300 |
| C | -3.46527000 | 2.03103300  | 0.21994000  |
| H | -4.54944400 | 2.18997300  | 0.28472100  |
| H | -2.98521500 | 2.43847300  | 1.11646300  |
| H | -3.07360500 | 2.55661700  | -0.65785500 |
| C | -3.92583000 | -0.50172000 | 1.52427700  |
| H | -3.45371000 | -0.14578000 | 2.44654300  |
| H | -4.99027500 | -0.23407300 | 1.53379800  |
| H | -3.82650600 | -1.59187000 | 1.47835200  |
| C | 4.23384400  | -0.96643400 | 0.66572600  |
| C | 4.08605300  | -0.65800700 | -0.69382600 |
| H | 3.72276400  | -1.77056000 | 1.18156800  |
| H | 3.66714900  | -1.24141100 | -1.50310100 |
| C | 5.14153100  | -0.04701100 | 1.21693500  |
| N | 4.94411800  | 0.38441700  | -0.95948800 |
| C | 5.55944200  | 0.77776900  | 0.18619400  |
| H | 5.45260300  | 0.02360100  | 2.25149400  |
| H | 6.23620100  | 1.62310800  | 0.19311600  |
| H | 5.07355100  | 0.81332800  | -1.86669500 |

7

E (M06/BS1) = -922.8926457 au

H(M06/BS1) = -922.614673 au

G(M06/BS1) = -922.682717 au

E(M06/BS2//M06/BS1) = -923.4255049 au

E(M06-D3/BS2//M06/BS1) = -923.4296418 au

|    |             |             |             |
|----|-------------|-------------|-------------|
| C  | -2.25682500 | 0.00182500  | -0.07084200 |
| C  | -1.19767800 | -0.82073000 | -0.11200000 |
| C  | -2.20601400 | 1.49843100  | 0.03217300  |
| H  | -2.78455900 | 1.87635400  | 0.88883900  |
| H  | -1.16979800 | 1.83504200  | 0.15325900  |
| H  | -2.61630800 | 1.98453200  | -0.86602300 |
| Au | 0.79344700  | -0.29385200 | -0.04265700 |
| P  | 3.10537600  | 0.26835600  | 0.04652900  |
| C  | 3.57062800  | 1.37096300  | 1.42702100  |
| H  | 4.64778700  | 1.58204600  | 1.40332800  |
| H  | 3.01578100  | 2.31291400  | 1.35166000  |
| H  | 3.31735500  | 0.89305300  | 2.38013600  |
| C  | 3.75073500  | 1.12716800  | -1.43066800 |
| H  | 4.81967000  | 1.34598100  | -1.30981700 |
| H  | 3.60824700  | 0.49708200  | -2.31573600 |
| H  | 3.20492300  | 2.06555200  | -1.57983400 |
| C  | 4.22546400  | -1.16129300 | 0.24146400  |
| H  | 4.09589200  | -1.84935300 | -0.60138100 |
| H  | 5.27050100  | -0.82733800 | 0.27917500  |
| H  | 3.98276600  | -1.69557600 | 1.16702600  |
| C  | -4.56851800 | 0.00967000  | -1.16103800 |

|   |             |             |             |
|---|-------------|-------------|-------------|
| C | -3.67053700 | -0.57933300 | -0.13624500 |
| H | -4.32446100 | -0.00477900 | -2.21835700 |
| C | -5.66705800 | 0.54691500  | -0.58181400 |
| N | -4.43771400 | -0.31885200 | 1.08791700  |
| C | -5.54305800 | 0.32043200  | 0.82689400  |
| H | -6.49847100 | 1.05392100  | -1.05449600 |
| H | -6.23239600 | 0.61264300  | 1.61350300  |
| H | -4.11932100 | -0.58622900 | 2.01525200  |
| H | -3.60778400 | -1.67054300 | -0.26713200 |
| H | -1.43158000 | -1.88866600 | -0.19247800 |

**TS<sub>7-8</sub>**

E (M06/BS1) = -1151.847455 au

H(M06/BS1) = -1151.505923 au

G(M06/BS1) = -1151.585341 au

E(M06/BS2//M06/BS1) = -1152.480402 au

E(M06-D3/BS2//M06/BS1) = -1152.487029 au

|    |             |             |             |
|----|-------------|-------------|-------------|
| C  | -1.72470600 | -0.75122100 | 0.48223000  |
| C  | -0.76412500 | -0.71829900 | -0.46754900 |
| C  | -1.47462600 | -0.47946200 | 1.93826000  |
| H  | -1.69993500 | -1.36403000 | 2.55072500  |
| H  | -0.42636600 | -0.20518600 | 2.10375100  |
| H  | -2.11016300 | 0.33647400  | 2.31869300  |
| Au | 1.25107500  | -0.34995700 | -0.19267800 |
| P  | 3.56971500  | 0.08486300  | 0.09091700  |
| C  | 4.50778500  | -1.25075200 | 0.90920900  |
| H  | 5.56525000  | -0.97162900 | 1.00325800  |
| H  | 4.09190100  | -1.43460400 | 1.90623100  |
| H  | 4.42808400  | -2.17317500 | 0.32308800  |
| C  | 3.94337100  | 1.55962900  | 1.10156300  |
| H  | 5.02886400  | 1.69865800  | 1.18942300  |
| H  | 3.50120100  | 2.44755200  | 0.63575200  |
| H  | 3.51186800  | 1.43938400  | 2.10168000  |
| C  | 4.48626400  | 0.37680500  | -1.46119900 |
| H  | 4.04931800  | 1.22949200  | -1.99291400 |
| H  | 5.54229300  | 0.58602500  | -1.24665500 |
| H  | 4.41667400  | -0.50786900 | -2.10389900 |
| C  | -4.21677000 | -1.30773000 | 1.05968400  |
| C  | -3.17427400 | -0.90580000 | 0.16675500  |
| H  | -4.18993200 | -1.15351800 | 2.13304200  |
| C  | -5.26468700 | -1.83385800 | 0.32610400  |
| N  | -3.63238600 | -1.32107200 | -1.10478800 |
| C  | -4.86329500 | -1.82489900 | -1.01322200 |
| H  | -6.22341000 | -2.17387800 | 0.69579800  |
| H  | -5.41480700 | -2.12061600 | -1.89814000 |
| H  | -3.13275000 | -1.17822200 | -1.97470400 |
| H  | -3.47491900 | 0.39962200  | 0.16427000  |
| H  | -1.09051800 | -0.91693800 | -1.49615700 |
| C  | -2.79584400 | 2.51969400  | -0.08417900 |
| O  | -3.70064100 | 1.68420200  | 0.10176800  |

|   |             |            |             |
|---|-------------|------------|-------------|
| H | -1.34951800 | 1.24244800 | -0.24556100 |
| O | -1.53881900 | 2.22548400 | -0.25894600 |
| C | -3.09435800 | 3.97346500 | -0.11574100 |
| H | -2.54797200 | 4.47250800 | 0.69281900  |
| H | -2.73610800 | 4.39957100 | -1.05923300 |
| H | -4.16572700 | 4.14617800 | -0.00403700 |

**TS<sub>7-water</sub>**

E (M06/BS1) = -1075.668907 au

H(M06/BS1) = -1075.340452 au

G(M06/BS1) = -1075.416706 au

E(M06/BS2//M06/BS1) = -1076.287160 au

E(M06-D3/BS2//M06/BS1) = -1076.293697 au

|    |             |             |             |
|----|-------------|-------------|-------------|
| C  | -1.97155000 | -0.17760900 | 0.48344800  |
| C  | -1.00913700 | -0.41721800 | -0.42813500 |
| C  | -1.71067400 | 0.34353300  | 1.86754200  |
| H  | -2.01364700 | -0.38485800 | 2.63351100  |
| H  | -0.64283000 | 0.55290900  | 2.00399700  |
| H  | -2.27157200 | 1.26935600  | 2.07396000  |
| Au | 1.03167900  | -0.23110200 | -0.16954700 |
| P  | 3.38931900  | -0.06803400 | 0.10051600  |
| C  | 4.11427200  | -1.37817100 | 1.14645500  |
| H  | 5.20041500  | -1.24360300 | 1.23121600  |
| H  | 3.66650300  | -1.34064000 | 2.14597000  |
| H  | 3.90478200  | -2.36041400 | 0.70799600  |
| C  | 3.97635700  | 1.47718700  | 0.87681600  |
| H  | 5.06934200  | 1.46271700  | 0.97817200  |
| H  | 3.68164500  | 2.33556400  | 0.26269000  |
| H  | 3.52330500  | 1.58613400  | 1.86874700  |
| C  | 4.34609600  | -0.16834100 | -1.45206800 |
| H  | 4.05047700  | 0.64738400  | -2.12133200 |
| H  | 5.42150400  | -0.09478500 | -1.24440900 |
| H  | 4.13929100  | -1.12155000 | -1.95164300 |
| C  | -4.48341200 | -0.56607900 | 1.11906300  |
| C  | -3.43170300 | -0.30339400 | 0.18293400  |
| H  | -4.45275200 | -0.27235200 | 2.16296500  |
| C  | -5.54252700 | -1.16258100 | 0.45938800  |
| N  | -3.90105900 | -0.87585500 | -1.02270800 |
| C  | -5.14123600 | -1.33737900 | -0.86941000 |
| H  | -6.50852400 | -1.43048000 | 0.86758000  |
| H  | -5.69943800 | -1.73384900 | -1.70957600 |
| H  | -3.40053800 | -0.85157000 | -1.90361700 |
| H  | -3.71445300 | 0.97653100  | -0.00079500 |
| H  | -1.33969800 | -0.78536100 | -1.40665400 |
| O  | -3.79629900 | 2.26375300  | -0.35985200 |
| H  | -2.84327200 | 2.57794300  | -0.43487500 |
| H  | -4.20967600 | 2.77604900  | 0.35499400  |
| O  | -1.18174900 | 2.73991700  | -0.57066100 |
| H  | -0.88546400 | 1.80623200  | -0.54782200 |
| H  | -0.76494500 | 3.14818800  | 0.20227400  |

H<sub>2</sub>O

E (M06/BS1) = -76.3803362 au

H(M06/BS1) = -76.355065 au

G(M06/BS1) = -76.376501 au

E(M06/BS2//M06/BS1) = -76.4283146 au

E(M06-D3/BS2//M06/BS1) = -76.4283147 au

|   |            |             |             |
|---|------------|-------------|-------------|
| O | 0.00000000 | 0.00000000  | 0.11947700  |
| H | 0.00000000 | 0.75818700  | -0.47790700 |
| H | 0.00000000 | -0.75818700 | -0.47790700 |

**TS<sub>7-pyrrole</sub>**

E (M06/BS1) = -1132.887483 au

H(M06/BS1) = -1132.525269 au

G(M06/BS1) = -1132.602991 au

E(M06/BS2//M06/BS1) = -1133.503079 au

E(M06-D3/BS2//M06/BS1) = -1133.510943 au

|    |             |             |             |
|----|-------------|-------------|-------------|
| C  | -1.57540500 | -0.65647500 | 0.51559400  |
| C  | -0.58509900 | -0.89689700 | -0.36182000 |
| C  | -1.39500300 | 0.03966700  | 1.83437800  |
| H  | -1.59192500 | -0.63620400 | 2.67988800  |
| H  | -0.36833200 | 0.41255200  | 1.93115900  |
| H  | -2.07978500 | 0.89581500  | 1.94322800  |
| Au | 1.39759500  | -0.38448200 | -0.14829500 |
| P  | 3.69538100  | 0.19795700  | 0.08738100  |
| C  | 4.61385400  | -0.82371000 | 1.29222900  |
| H  | 5.66244700  | -0.50311100 | 1.34692500  |
| H  | 4.15415700  | -0.72572700 | 2.28228300  |
| H  | 4.57275500  | -1.87700000 | 0.99269200  |
| C  | 4.00245800  | 1.90636400  | 0.65725700  |
| H  | 5.08069200  | 2.09088700  | 0.74958800  |
| H  | 3.57388500  | 2.61796900  | -0.05743400 |
| H  | 3.52525800  | 2.06082200  | 1.63163700  |
| C  | 4.69137400  | 0.06888900  | -1.43892600 |
| H  | 4.28837700  | 0.74641600  | -2.20017100 |
| H  | 5.73770300  | 0.33287700  | -1.23664900 |
| H  | 4.64559100  | -0.95545000 | -1.82534300 |
| C  | -4.04148000 | -1.26542100 | 1.18270100  |
| C  | -3.00416900 | -0.98562200 | 0.22998700  |
| H  | -4.06494500 | -0.85460300 | 2.18663200  |
| C  | -5.02880900 | -2.01455800 | 0.57088100  |
| N  | -3.38620800 | -1.72580700 | -0.91204400 |
| C  | -4.58600800 | -2.28114500 | -0.73030900 |
| H  | -5.97388400 | -2.33301100 | 0.99172800  |
| H  | -5.08527500 | -2.81434300 | -1.53104100 |
| H  | -2.86393500 | -1.74999300 | -1.78023200 |
| H  | -3.47635400 | 0.20951900  | -0.08663800 |
| H  | -0.85907900 | -1.42059400 | -1.28590800 |



|   |             |            |             |
|---|-------------|------------|-------------|
| C | -4.24168100 | 2.30734000 | 0.28984900  |
| C | -3.18524700 | 3.17876500 | 0.56227200  |
| C | -2.20303200 | 2.94187400 | -0.39587900 |
| H | -5.17399400 | 2.21733100 | 0.83609100  |
| H | -3.11925300 | 3.90010400 | 1.36714900  |
| H | -1.21865800 | 3.38023400 | -0.50946100 |
| H | -2.09182100 | 1.58532900 | -1.99001500 |
| H | -4.52898100 | 0.99771600 | -1.50991300 |
| C | -3.87094900 | 1.49563500 | -0.79915000 |
| N | -2.63239100 | 1.97423300 | -1.22738500 |

**8**

E (M06/BS1) = -1151.859305 au

H(M06/BS1) = -1151.513586 au

G(M06/BS1) = -1151.595277 au

E(M06/BS2//M06/BS1) = -1152.495344 au

E(M06-D3/BS2//M06/BS1) = -1152.502044 au

|    |             |             |             |
|----|-------------|-------------|-------------|
| C  | -1.69229000 | -0.98017600 | 0.47238300  |
| C  | -0.76367700 | -0.66793100 | -0.47205200 |
| C  | -1.37908800 | -1.01159300 | 1.94329100  |
| H  | -1.64131800 | -1.98346400 | 2.38263000  |
| H  | -0.31276900 | -0.82591700 | 2.11470000  |
| H  | -1.95038900 | -0.25018400 | 2.49729600  |
| Au | 1.25013800  | -0.29256500 | -0.19913800 |
| P  | 3.57558600  | 0.11225800  | 0.06817800  |
| C  | 4.33024600  | -0.73009800 | 1.50220200  |
| H  | 5.40480300  | -0.51086600 | 1.55132800  |
| H  | 3.84965900  | -0.38946500 | 2.42622100  |
| H  | 4.18585400  | -1.81262900 | 1.41264800  |
| C  | 4.03681900  | 1.86370300  | 0.30230000  |
| H  | 5.12409300  | 1.95974100  | 0.41894700  |
| H  | 3.71326700  | 2.45104500  | -0.56431400 |
| H  | 3.54143500  | 2.25890900  | 1.19627800  |
| C  | 4.60304900  | -0.42522000 | -1.34263700 |
| H  | 4.29553100  | 0.10833000  | -2.24905600 |
| H  | 5.66270500  | -0.21874700 | -1.14333700 |
| H  | 4.46903100  | -1.50007100 | -1.50859400 |
| C  | -4.21539500 | -1.23652200 | 0.99124000  |
| C  | -3.10058300 | -1.21419300 | 0.15076800  |
| H  | -4.18757700 | -1.13707500 | 2.07102800  |
| C  | -5.36702800 | -1.41809900 | 0.19021400  |
| N  | -3.58230200 | -1.37670300 | -1.13356000 |
| C  | -4.93908800 | -1.50941500 | -1.11549400 |
| H  | -6.39340900 | -1.47343600 | 0.53072600  |
| H  | -5.49409100 | -1.65275400 | -2.03375900 |
| H  | -3.00673900 | -1.45000300 | -1.96252500 |
| H  | -1.12869300 | -0.64405300 | -1.50800200 |
| C  | -2.79257900 | 2.43846700  | 0.05370200  |
| O  | -3.81044400 | 1.67066000  | 0.16327400  |
| C  | -3.04931200 | 3.88111300  | -0.10377800 |

|   |             |            |             |
|---|-------------|------------|-------------|
| O | -1.58068300 | 2.04809500 | 0.05227100  |
| H | -3.03985400 | 4.11286200 | -1.17715000 |
| H | -2.25076700 | 4.45771800 | 0.36960700  |
| H | -4.02744000 | 4.14540100 | 0.30215300  |
| H | -1.39513800 | 1.03739100 | 0.03320400  |
| H | -3.63422500 | 0.69267200 | 0.32696100  |

## 9

E (M06/BS1) = -922.9481266 au

H(M06/BS1) = -922.669647 au

G(M06/BS1) = -922.736169 au

E(M06/BS2//M06/BS1) = -923.4831873 au

E(M06-D3/BS2//M06/BS1) = -923.487428 au

|    |             |             |             |
|----|-------------|-------------|-------------|
| Au | 0.51952700  | -0.46178700 | -0.27836900 |
| P  | 2.50906500  | 0.65259400  | 0.26761300  |
| C  | 2.47264700  | 1.49227300  | 1.88354300  |
| H  | 3.43393400  | 1.98937000  | 2.06698800  |
| H  | 1.66952500  | 2.23701000  | 1.89685200  |
| H  | 2.28635800  | 0.75906300  | 2.67576300  |
| C  | 3.95293000  | -0.45503800 | 0.34671300  |
| H  | 4.09970000  | -0.94026100 | -0.62455800 |
| H  | 4.85227100  | 0.11837300  | 0.60613100  |
| H  | 3.78504700  | -1.22832400 | 1.10429900  |
| C  | 2.97786800  | 1.94623200  | -0.92493600 |
| H  | 3.91430300  | 2.42373700  | -0.60904200 |
| H  | 3.11431400  | 1.50235300  | -1.91722200 |
| H  | 2.18661800  | 2.70142400  | -0.98309500 |
| C  | -2.04293600 | -1.13776500 | 0.14134900  |
| C  | -1.27124600 | -1.56749400 | -0.94556700 |
| C  | -2.04798100 | -1.94503500 | 1.40273100  |
| H  | -3.04567900 | -2.37557300 | 1.56245200  |
| H  | -1.32392900 | -2.76370500 | 1.34963300  |
| H  | -1.81527400 | -1.32738900 | 2.27845400  |
| C  | -3.69579400 | 0.55099000  | 1.10427700  |
| C  | -2.85111600 | 0.03387400  | 0.11769600  |
| H  | -3.85958900 | 0.10948500  | 2.08095400  |
| C  | -4.29092600 | 1.71374500  | 0.60110300  |
| N  | -2.94240900 | 0.89114700  | -0.96699000 |
| C  | -3.79676800 | 1.89897300  | -0.68226500 |
| H  | -5.00230800 | 2.35589200  | 1.10461400  |
| H  | -3.99723100 | 2.67942500  | -1.40554000 |
| H  | -2.42816400 | 0.80499100  | -1.83386300 |
| H  | -0.92311800 | -2.60277800 | -0.92959400 |
| H  | -1.46860400 | -1.17337300 | -1.94517900 |

AcOH

E (M06/BS1) = -228.9599498 au

H(M06/BS1) = -228.892416 au

G(M06/BS1) = -228.924721 au

E(M06/BS2//M06/BS1) = -229.0620771 au

E(M06-D3/BS2//M06/BS1) = -229.0623695 au

|   |             |             |             |
|---|-------------|-------------|-------------|
| C | 0.09243400  | 0.12138700  | -0.00018400 |
| O | 0.65177500  | 1.19431900  | 0.00000300  |
| C | -1.38635000 | -0.10035900 | -0.00006300 |
| O | 0.76262000  | -1.04402500 | 0.00009400  |
| H | -1.67833700 | -0.68042900 | 0.88280800  |
| H | -1.67828400 | -0.68352700 | -0.88088000 |
| H | -1.90700800 | 0.85930600  | -0.00166600 |
| H | 1.71195600  | -0.82386700 | 0.00044300  |

### TS<sub>9-10</sub>

E (M06/BS1) = -1132.935999 au

H(M06/BS1) = -1132.56919 au

G(M06/BS1) = -1132.64526 au

E(M06/BS2//M06/BS1) = -1133.549346 au

E(M06-D3/BS2//M06/BS1) = -1133.557112 au

|    |             |             |             |
|----|-------------|-------------|-------------|
| C  | 1.79832500  | -0.00513300 | 0.67138300  |
| C  | 1.06341600  | -0.91984000 | -0.21035300 |
| H  | 1.34917300  | -0.85340600 | -1.27001100 |
| H  | 1.16742100  | -1.96316000 | 0.10894700  |
| C  | 3.72663200  | -0.44564400 | 0.52680100  |
| C  | 3.87899000  | -1.83407400 | 0.81615200  |
| C  | 4.04840000  | -2.51617600 | -0.37052900 |
| C  | 4.10864000  | -1.54747300 | -1.38967500 |
| N  | 4.00671300  | -0.33540000 | -0.84549400 |
| H  | 3.98134500  | 0.53470100  | -1.36509300 |
| H  | 4.09583700  | 0.34540200  | 1.17415800  |
| H  | 3.80172900  | -2.26383400 | 1.80874400  |
| H  | 4.12010000  | -3.58616700 | -0.51912300 |
| H  | 4.21431300  | -1.67913600 | -2.46035500 |
| C  | 1.60170000  | -0.23142600 | 2.15725700  |
| H  | 2.40033600  | 0.21392900  | 2.76285100  |
| H  | 0.65603300  | 0.23305000  | 2.46828200  |
| H  | 1.54509600  | -1.30212000 | 2.38424700  |
| C  | 2.18029300  | 2.52853200  | 1.04261400  |
| C  | 2.09767700  | 3.66033500  | 0.20203000  |
| H  | 2.47250500  | 2.52247300  | 2.08742500  |
| C  | 1.71156100  | 3.21382500  | -1.04401500 |
| H  | 1.18784300  | 1.28661200  | -1.72710200 |
| H  | 2.29889700  | 4.68944100  | 0.47401100  |
| H  | 1.51399300  | 3.75369100  | -1.96144800 |
| C  | 1.83689800  | 1.41212000  | 0.29525800  |
| N  | 1.57616900  | 1.85674400  | -0.98638500 |
| Au | -1.01964300 | -0.45955400 | -0.10482500 |
| P  | -3.33987400 | -0.00652400 | -0.00253500 |
| C  | -3.83845800 | 1.06350900  | 1.39009800  |
| H  | -3.32996700 | 2.03104300  | 1.31307600  |
| H  | -4.92472500 | 1.22199400  | 1.37893800  |

|   |             |             |             |
|---|-------------|-------------|-------------|
| H | -3.55178400 | 0.59285000  | 2.33724400  |
| C | -4.02222300 | 0.83442100  | -1.47205300 |
| H | -3.84719600 | 0.22206000  | -2.36367000 |
| H | -5.10093300 | 0.99808200  | -1.35100600 |
| H | -3.52416600 | 1.80090300  | -1.60849400 |
| C | -4.38640200 | -1.48938000 | 0.18500400  |
| H | -5.44580500 | -1.20502400 | 0.22723500  |
| H | -4.22675200 | -2.16468800 | -0.66296400 |
| H | -4.11626000 | -2.01706700 | 1.10661600  |

## 10

E (M06/BS1) = -1132.941925 au

H(M06/BS1) = -1132.573768 au

G(M06/BS1) = -1132.650347 au

E(M06/BS2//M06/BS1) = -1133.554207 au

E(M06-D3/BS2//M06/BS1) = -1133.561861 au

|    |             |             |             |
|----|-------------|-------------|-------------|
| C  | 1.93294300  | -0.06749600 | 0.68620800  |
| C  | 1.02738300  | -0.92552800 | -0.19609100 |
| H  | 1.36108600  | -0.89200700 | -1.24655300 |
| H  | 1.13385300  | -1.97545600 | 0.11728300  |
| C  | 3.45208400  | -0.51052900 | 0.52054900  |
| C  | 3.75833800  | -1.94717200 | 0.66963500  |
| C  | 4.32974000  | -2.42468000 | -0.46238300 |
| C  | 4.42510900  | -1.32398400 | -1.37046400 |
| N  | 3.95011800  | -0.24105500 | -0.81751100 |
| H  | 3.88676500  | 0.67289100  | -1.25942200 |
| H  | 4.04606300  | 0.08501400  | 1.23330700  |
| H  | 3.54051900  | -2.50833400 | 1.57261400  |
| H  | 4.66184000  | -3.43266800 | -0.67536200 |
| H  | 4.82311000  | -1.32013200 | -2.38055300 |
| C  | 1.59435800  | -0.25980600 | 2.16556600  |
| H  | 2.30426600  | 0.25451900  | 2.82695600  |
| H  | 0.59389300  | 0.14562900  | 2.36153700  |
| H  | 1.58211700  | -1.32515500 | 2.43324700  |
| C  | 2.47994200  | 2.47995700  | 0.96696400  |
| C  | 2.23618700  | 3.63118500  | 0.17378700  |
| H  | 3.02939600  | 2.44937700  | 1.90313300  |
| C  | 1.52561100  | 3.22195100  | -0.93015500 |
| H  | 0.77149500  | 1.30785500  | -1.45300000 |
| H  | 2.54756100  | 4.64651800  | 0.39015200  |
| H  | 1.12648200  | 3.77789000  | -1.76898600 |
| C  | 1.90290900  | 1.39584800  | 0.33249700  |
| N  | 1.34763300  | 1.86708000  | -0.83565700 |
| Au | -1.03120100 | -0.47148900 | -0.10196100 |
| P  | -3.36532300 | -0.00101400 | -0.01404300 |
| C  | -3.87685200 | 1.09483400  | 1.35604800  |
| H  | -3.35924300 | 2.05714000  | 1.27178200  |
| H  | -4.96145000 | 1.26291300  | 1.32872500  |
| H  | -3.60683900 | 0.63750700  | 2.31467200  |
| C  | -4.03927900 | 0.82646300  | -1.49768400 |

|   |             |             |             |
|---|-------------|-------------|-------------|
| H | -3.86202800 | 0.20336600  | -2.38158100 |
| H | -5.11790500 | 0.99772000  | -1.38605200 |
| H | -3.53542700 | 1.78876300  | -1.64336700 |
| C | -4.43899200 | -1.46540500 | 0.18543200  |
| H | -5.49480400 | -1.16613900 | 0.21498300  |
| H | -4.28253600 | -2.15537800 | -0.65144000 |
| H | -4.18465500 | -1.98496800 | 1.11625100  |

**TS<sub>10-11</sub>**

E (M06/BS1) = -1361.887440 au

H(M06/BS1) = -1361.454881 au

G(M06/BS1) = -1361.543008 au

E(M06/BS2//M06/BS1) = -1362.600535 au

E(M06-D3/BS2//M06/BS1) = -1362.611806 au

|    |             |             |             |
|----|-------------|-------------|-------------|
| C  | 1.17864700  | -0.57944200 | 0.36412500  |
| C  | 0.02670800  | -1.39211500 | -0.25931800 |
| H  | 0.22133200  | -1.56707300 | -1.33060600 |
| H  | 0.03910400  | -2.39310700 | 0.20090700  |
| C  | 2.51566800  | -1.27009500 | 0.04677100  |
| C  | 3.08652900  | -2.41085600 | 0.66092300  |
| C  | 3.94598000  | -3.03383000 | -0.24473100 |
| C  | 3.85091200  | -2.32961900 | -1.43980000 |
| N  | 2.98776300  | -1.31231400 | -1.27730200 |
| H  | 2.73468000  | -0.63572000 | -1.99038900 |
| H  | 3.50829200  | -0.45335100 | 0.67311800  |
| H  | 2.92610000  | -2.68778700 | 1.69803200  |
| H  | 4.58761700  | -3.88606500 | -0.06003000 |
| H  | 4.37868100  | -2.47393900 | -2.37526100 |
| C  | 1.01839400  | -0.53653900 | 1.88384300  |
| H  | 1.88608600  | -0.09026200 | 2.38896600  |
| H  | 0.12919600  | 0.04984000  | 2.14735100  |
| H  | 0.87851700  | -1.55045800 | 2.28050900  |
| C  | 1.57450400  | 2.02106200  | 0.41047400  |
| C  | 1.53641500  | 3.03560500  | -0.58881500 |
| H  | 1.83502800  | 2.15716400  | 1.45530300  |
| C  | 1.17198800  | 2.43336000  | -1.76731200 |
| H  | 0.53427900  | 0.45461600  | -2.14927900 |
| H  | 1.75125800  | 4.08932400  | -0.45190400 |
| H  | 1.00348200  | 2.84100000  | -2.75601100 |
| C  | 1.22864000  | 0.82553000  | -0.18249600 |
| N  | 1.01142200  | 1.08983900  | -1.52072600 |
| Au | -1.87923200 | -0.52475500 | -0.04131400 |
| P  | -4.04899300 | 0.44745300  | 0.17845700  |
| C  | -4.06920400 | 2.27417300  | 0.24490500  |
| H  | -3.63343300 | 2.67974100  | -0.67533700 |
| H  | -5.09684200 | 2.64515700  | 0.35277200  |
| H  | -3.46932400 | 2.61879600  | 1.09484700  |
| C  | -5.20916100 | 0.06002000  | -1.17994900 |
| H  | -5.34634700 | -1.02500200 | -1.25092400 |
| H  | -6.18248500 | 0.53666600  | -1.00404600 |

|   |             |             |             |
|---|-------------|-------------|-------------|
| H | -4.79779900 | 0.42066100  | -2.12973100 |
| C | -4.96953400 | -0.04336700 | 1.67943100  |
| H | -5.95000600 | 0.44981700  | 1.70910800  |
| H | -5.11155500 | -1.13005500 | 1.68670200  |
| H | -4.39686900 | 0.23762200  | 2.57062800  |
| C | 4.88223000  | 1.19467500  | 0.70398900  |
| O | 4.28069700  | 0.26489200  | 1.28105000  |
| C | 4.84025400  | 1.47877100  | -0.74595000 |
| O | 5.60987600  | 2.01203200  | 1.41020300  |
| H | 5.66335300  | 2.13609700  | -1.03275500 |
| H | 3.88584100  | 1.98325000  | -0.96924300 |
| H | 4.88127900  | 0.54460300  | -1.31367900 |
| H | 5.56203800  | 1.77021400  | 2.35754800  |

## 11

E (M06/BS1) = -1361.892102 au

H(M06/BS1) = -1361.454504 au

G(M06/BS1) = -1361.542048 au

E(M06/BS2//M06/BS1) = -1362.607621 au

E(M06-D3/BS2//M06/BS1) = -1362.618628 au

|    |             |             |             |
|----|-------------|-------------|-------------|
| C  | 1.15104900  | -0.93564600 | -0.79878800 |
| C  | 0.46753600  | 0.43602900  | -0.96798700 |
| H  | 0.97240700  | 1.19795400  | -0.34860700 |
| H  | 0.58571000  | 0.77524700  | -2.00982400 |
| C  | 2.65488100  | -0.82249500 | -0.95539900 |
| C  | 3.69049300  | -1.47184500 | -0.30453200 |
| C  | 4.92113000  | -1.09820700 | -0.93721700 |
| C  | 4.61612600  | -0.22570400 | -1.94238000 |
| N  | 3.23976400  | -0.01984500 | -1.91874900 |
| H  | 2.71707900  | 0.43375400  | -2.66222300 |
| H  | 3.69356500  | 0.00783600  | 0.88219200  |
| H  | 3.55563300  | -2.20153400 | 0.48891500  |
| H  | 5.91546100  | -1.42528100 | -0.65841200 |
| H  | 5.24065700  | 0.30884600  | -2.64652600 |
| C  | 0.65658900  | -1.89779400 | -1.88863700 |
| H  | 1.17170200  | -2.86551300 | -1.83527800 |
| H  | -0.42294700 | -2.06601400 | -1.77975000 |
| H  | 0.83831200  | -1.47217200 | -2.88481400 |
| C  | 0.69777900  | -2.84013400 | 0.95544000  |
| C  | 0.53117100  | -2.84885200 | 2.36872400  |
| H  | 0.70007800  | -3.70690200 | 0.30330500  |
| C  | 0.61580100  | -1.54720900 | 2.79666100  |
| H  | 0.78393600  | 0.25068200  | 1.69847700  |
| H  | 0.37133300  | -3.71720200 | 2.99752100  |
| H  | 0.52676000  | -1.11219700 | 3.78427700  |
| C  | 0.87480800  | -1.53248900 | 0.55712300  |
| N  | 0.85085800  | -0.75862600 | 1.69737100  |
| Au | -1.58197400 | 0.41273200  | -0.46915900 |
| P  | -3.86525100 | 0.32246100  | 0.19590300  |
| C  | -4.11383500 | -0.67122700 | 1.70982700  |

|   |             |             |             |
|---|-------------|-------------|-------------|
| H | -3.53618100 | -0.23477200 | 2.53310300  |
| H | -5.17568200 | -0.70037700 | 1.98742600  |
| H | -3.75411300 | -1.69282400 | 1.54058300  |
| C | -4.65018300 | 1.92239400  | 0.60037500  |
| H | -4.64267900 | 2.57284100  | -0.28148800 |
| H | -5.68716300 | 1.76786400  | 0.92589000  |
| H | -4.09012300 | 2.41647100  | 1.40247600  |
| C | -5.01867400 | -0.42646500 | -1.00728200 |
| H | -6.03549100 | -0.46038400 | -0.59454500 |
| H | -5.02340900 | 0.16419300  | -1.93039300 |
| H | -4.69242000 | -1.44469700 | -1.24742900 |
| C | 3.96189100  | 1.93264400  | 1.05989000  |
| O | 3.90565200  | 0.75476300  | 1.54030200  |
| C | 4.32300600  | 3.03610900  | 1.96287100  |
| O | 3.74260900  | 2.21944300  | -0.16898200 |
| H | 3.93756100  | 3.98434700  | 1.58309800  |
| H | 5.41913100  | 3.09579400  | 2.00069900  |
| H | 3.96215100  | 2.83077000  | 2.97339600  |
| H | 3.52555100  | 1.45150300  | -0.77006600 |

### TS<sub>11-9</sub>

E (M06/BS1) = -1361.875476 au

H(M06/BS1) = -1361.443466 au

G(M06/BS1) = -1361.530334 au

E(M06/BS2//M06/BS1) = -1362.591181 au

E(M06-D3/BS2//M06/BS1) = -1362.602733 au

|   |             |             |             |
|---|-------------|-------------|-------------|
| C | 1.21680200  | 0.77219900  | 0.74292000  |
| C | 0.85098800  | -0.68351300 | 0.35955400  |
| H | 0.91729500  | -1.00433600 | -0.69088900 |
| H | 0.81905700  | -1.44213400 | 1.15516900  |
| C | 2.69904200  | 1.06363000  | 0.56761700  |
| C | 3.39298300  | 1.78232000  | -0.39686100 |
| C | 4.77514800  | 1.77061800  | -0.04674300 |
| C | 4.89390600  | 1.03971500  | 1.10691000  |
| N | 3.63843700  | 0.61437100  | 1.46644300  |
| H | 3.44019400  | 0.06066500  | 2.28997600  |
| H | 3.60251600  | -0.15757500 | -1.07330900 |
| H | 2.94173300  | 2.31964100  | -1.22382300 |
| H | 5.58358600  | 2.24461500  | -0.58997900 |
| H | 5.75979900  | 0.77559300  | 1.70028000  |
| C | 0.85813300  | 0.98539800  | 2.21916100  |
| H | 1.17721500  | 1.97672600  | 2.56447500  |
| H | -0.22484700 | 0.89216000  | 2.36800900  |
| H | 1.33472900  | 0.22928300  | 2.85652100  |
| C | -0.47354500 | 2.73312300  | 0.28155300  |
| C | -1.02752500 | 3.29541700  | -0.90126900 |
| H | -0.70879000 | 3.02048400  | 1.30033300  |
| C | -0.45973800 | 2.64235900  | -1.96809700 |
| H | 0.94730300  | 1.06780200  | -2.04024900 |
| H | -1.74955200 | 4.10196100  | -0.95964000 |

|    |             |             |             |
|----|-------------|-------------|-------------|
| H  | -0.58856700 | 2.76762700  | -3.03572100 |
| C  | 0.41538300  | 1.74539600  | -0.09169200 |
| N  | 0.41756900  | 1.71227200  | -1.46906400 |
| Au | -1.34948300 | -0.70922800 | 0.17430000  |
| P  | -3.65313700 | -0.39688400 | -0.07110600 |
| C  | -4.01529900 | 0.65802200  | -1.51405400 |
| H  | -3.73034100 | 0.13568800  | -2.43443800 |
| H  | -5.08362700 | 0.90778600  | -1.55292400 |
| H  | -3.42245700 | 1.57877700  | -1.43893100 |
| C  | -4.72268800 | -1.85806000 | -0.27689800 |
| H  | -4.63609100 | -2.50890900 | 0.59997700  |
| H  | -5.76848500 | -1.54576100 | -0.39370000 |
| H  | -4.41216600 | -2.42113100 | -1.16400900 |
| C  | -4.37277900 | 0.51672700  | 1.33381100  |
| H  | -5.43456500 | 0.72682200  | 1.15044700  |
| H  | -4.27198300 | -0.06963100 | 2.25383900  |
| H  | -3.83226100 | 1.46281800  | 1.46004500  |
| C  | 3.89149300  | -2.04765300 | -0.74218100 |
| O  | 4.06821400  | -0.96773300 | -1.43124400 |
| C  | 4.77745700  | -3.17897400 | -1.09383600 |
| O  | 3.04874200  | -2.16822200 | 0.18037300  |
| H  | 4.37760700  | -4.11562000 | -0.70213900 |
| H  | 5.76527300  | -2.99671900 | -0.65195800 |
| H  | 4.90918000  | -3.22966300 | -2.17872900 |
| H  | 2.16824900  | -1.41392000 | 0.27416500  |

### prod1

E (M06/BS1) = -326.6296701 au

H(M06/BS1) = -326.477729 au

G(M06/BS1) = -326.518562 au

E(M06/BS2//M06/BS1) = -326.76133 au

E(M06-D3/BS2//M06/BS1) = -326.762753 au

|   |             |             |             |
|---|-------------|-------------|-------------|
| C | -1.39979400 | 0.12146200  | -0.00001100 |
| C | -2.03924400 | 1.30107800  | -0.00006200 |
| C | -2.16467200 | -1.16991700 | 0.00006200  |
| H | -1.91724700 | -1.77758100 | 0.88170100  |
| H | -3.24507100 | -0.98943000 | 0.00001800  |
| H | -1.91719100 | -1.77771400 | -0.88146600 |
| C | 0.83370600  | -1.15317700 | -0.00004300 |
| C | 0.05007800  | -0.00990800 | -0.00001500 |
| H | 0.45930600  | -2.17102100 | -0.00011100 |
| C | 2.19233900  | -0.75577100 | -0.00000200 |
| N | 0.91781200  | 1.06155900  | -0.00004200 |
| C | 2.21175200  | 0.62072200  | 0.00004600  |
| H | 3.06125400  | -1.40349800 | -0.00006700 |
| H | 3.03767400  | 1.32091700  | 0.00002300  |
| H | 0.64334000  | 2.03385400  | 0.00049300  |
| H | -3.12663000 | 1.34497300  | -0.00004300 |
| H | -1.52510400 | 2.26166100  | -0.00010400 |



**prod2**

E (M06/BS1) = -536.673831 au

H(M06/BS1) = -536.431054 au

G(M06/BS1) = -536.482238 au

E(M06/BS2//M06/BS1) = -536.8849063 au

E(M06-D3/BS2//M06/BS1) = -536.8890818 au

|   |             |             |             |
|---|-------------|-------------|-------------|
| C | -0.01857500 | 0.96076800  | 0.01697400  |
| C | -0.04648400 | 1.77858000  | 1.31972000  |
| H | -0.06725600 | 1.13294700  | 2.20753800  |
| H | 0.84855300  | 2.41132600  | 1.37727000  |
| H | -0.91988000 | 2.44516300  | 1.36217100  |
| C | 1.26619200  | 0.17751900  | -0.04135600 |
| C | 2.37972800  | 0.29456800  | -0.84561900 |
| C | 3.33377200  | -0.66846800 | -0.41338800 |
| C | 2.77750700  | -1.34763800 | 0.64328600  |
| N | 1.53183200  | -0.82032100 | 0.86744900  |
| H | 0.85637700  | -1.17959100 | 1.52900100  |
| H | 2.50270400  | 1.00386900  | -1.65672900 |
| H | 4.31794900  | -0.84038600 | -0.83454100 |
| H | 3.15597900  | -2.16100000 | 1.24966700  |
| C | -0.08483700 | 1.93029500  | -1.16897700 |
| H | -0.02746400 | 1.38803400  | -2.12139200 |
| H | -1.03085500 | 2.48731000  | -1.14938400 |
| H | 0.73813600  | 2.65740900  | -1.12832900 |
| C | -1.30024000 | -1.25248500 | -0.59155800 |
| C | -2.65676100 | -1.66198100 | -0.48232600 |
| H | -0.48077000 | -1.81626300 | -1.02502500 |
| C | -3.34416500 | -0.63751000 | 0.12203800  |
| H | -2.68531500 | 1.24647700  | 0.82556300  |
| H | -3.07827100 | -2.60723200 | -0.80533100 |
| H | -4.38508600 | -0.54326100 | 0.40507900  |
| C | -1.19216000 | 0.01182500  | -0.04927500 |
| N | -2.45021300 | 0.37208500  | 0.37645400  |

**TS<sub>9-12</sub>**

E (M06/BS1) = -1151.907896 au

H(M06/BS1) = -1151.561119 au

G(M06/BS1) = -1151.639650 au

E(M06/BS2//M06/BS1) = -1152.5392 au

E(M06-D3/BS2//M06/BS1) = -1152.547205 au

|    |             |            |             |
|----|-------------|------------|-------------|
| Au | -0.66599000 | 0.35669800 | -0.30887200 |
| P  | 0.90819600  | 2.00992500 | 0.06348900  |
| C  | 2.26747200  | 1.98844400 | -1.14728000 |
| H  | 2.96023200  | 2.81495300 | -0.94220500 |
| H  | 2.80366000  | 1.03445000 | -1.06014300 |
| H  | 1.87034700  | 2.08871400 | -2.16340500 |
| C  | 0.25576500  | 3.70929700 | 0.02072900  |
| H  | -0.50950700 | 3.83154200 | 0.79495700  |
| H  | 1.06840800  | 4.42688500 | 0.19424400  |

|   |             |             |             |
|---|-------------|-------------|-------------|
| H | -0.19813100 | 3.90464100  | -0.95700000 |
| C | 1.73155900  | 1.85094400  | 1.67814500  |
| H | 2.46729800  | 2.65673700  | 1.79958200  |
| H | 0.99013200  | 1.91254300  | 2.48230300  |
| H | 2.24371100  | 0.88122600  | 1.73634800  |
| C | 0.97855000  | -1.97213300 | -0.95760800 |
| C | -0.30308800 | -2.24533700 | -0.59769500 |
| C | 1.34711700  | -1.82998300 | -2.40447700 |
| H | 2.09137000  | -2.58522100 | -2.69064800 |
| H | 0.47005000  | -1.94804100 | -3.04924700 |
| H | 1.79439500  | -0.84736200 | -2.60884500 |
| C | 3.39372400  | -1.49128000 | -0.23491400 |
| C | 2.05709900  | -1.79237100 | -0.00612900 |
| H | 3.85277500  | -1.37548800 | -1.21133800 |
| C | 4.03771900  | -1.38039600 | 1.01760500  |
| N | 1.89611100  | -1.86394700 | 1.36197300  |
| C | 3.08429900  | -1.61779500 | 1.98589100  |
| H | 5.08344700  | -1.16141200 | 1.19625600  |
| H | 3.16084000  | -1.64077100 | 3.06565700  |
| H | 1.02831600  | -2.06482500 | 1.84055700  |
| H | -1.06194000 | -2.42706800 | -1.35668200 |
| H | -0.59842600 | -2.44914500 | 0.43308300  |
| O | -2.85153400 | -0.48668800 | -0.43524500 |
| C | -3.54797600 | -0.70252500 | 0.55262500  |
| O | -3.15693800 | -0.44250700 | 1.79009100  |
| H | -2.26700700 | -0.03532500 | 1.77695900  |
| C | -4.91656200 | -1.28237500 | 0.48415900  |
| H | -5.17299500 | -1.52354000 | -0.54850000 |
| H | -4.96765300 | -2.18240400 | 1.10671700  |
| H | -5.63811300 | -0.56482200 | 0.89102800  |

## 12

E (M06/BS1) = -825.261754 au

H(M06/BS1) = -825.069069 au

G(M06/BS1) = -825.126916 au

E(M06/BS2//M06/BS1) = -825.769396 au

E(M06-D3/BS2//M06/BS1) = -825.771679 au

|    |             |             |             |
|----|-------------|-------------|-------------|
| Au | -0.08691700 | -0.23033400 | -0.00496100 |
| P  | 2.15997300  | 0.16435100  | 0.00385300  |
| C  | 2.56718600  | 1.92894100  | -0.15346000 |
| H  | 3.65618800  | 2.06338600  | -0.13402000 |
| H  | 2.16899600  | 2.31721700  | -1.09712200 |
| H  | 2.11626000  | 2.48538900  | 0.67531800  |
| C  | 2.97220000  | -0.39153300 | 1.53192200  |
| H  | 2.83056500  | -1.47078200 | 1.65392700  |
| H  | 4.04559700  | -0.16756600 | 1.48558500  |
| H  | 2.52910200  | 0.12203600  | 2.39200600  |
| C  | 3.03992400  | -0.66618900 | -1.35222500 |
| H  | 4.11240300  | -0.44134400 | -1.29148400 |
| H  | 2.89036200  | -1.74891300 | -1.28142300 |

|   |             |             |             |
|---|-------------|-------------|-------------|
| H | 2.64862200  | -0.31728600 | -2.31406100 |
| C | -3.10313600 | 0.17944100  | -0.00042300 |
| O | -2.22948700 | -0.68620500 | -0.00269200 |
| O | -2.74357800 | 1.44907000  | -0.00982800 |
| C | -4.55429100 | -0.14968700 | 0.01922200  |
| H | -5.00972000 | 0.24422600  | 0.93600500  |
| H | -5.06042400 | 0.32033400  | -0.83215500 |
| H | -4.69491100 | -1.23066000 | -0.02073600 |
| H | -3.51297100 | 2.04631100  | -0.00778100 |

### TS<sub>12-13</sub>

E (M06/BS1) = -1151.891482 au

H(M06/BS1) = -1151.549517 au

G(M06/BS1) = -1151.633687 au

E(M06/BS2//M06/BS1) = -1152.523292 au

E(M06-D3/BS2//M06/BS1) = -1152.529047 au

|    |             |             |             |
|----|-------------|-------------|-------------|
| Au | -1.78345800 | 0.50028600  | -0.11898200 |
| P  | -2.93311700 | -1.45290700 | 0.15673700  |
| C  | -1.85005600 | -2.87001100 | 0.51949900  |
| H  | -2.44754100 | -3.78570600 | 0.61493700  |
| H  | -1.12019100 | -2.99365400 | -0.28796600 |
| H  | -1.31040500 | -2.68842600 | 1.45553100  |
| C  | -4.13246800 | -1.41293900 | 1.52455000  |
| H  | -4.87831700 | -0.63214700 | 1.34020900  |
| H  | -4.63570700 | -2.38446100 | 1.61072900  |
| H  | -3.61302300 | -1.18822600 | 2.46249100  |
| C  | -3.89416100 | -1.95019500 | -1.30617100 |
| H  | -4.40207200 | -2.90420000 | -1.11481600 |
| H  | -4.63958700 | -1.18122100 | -1.53674800 |
| H  | -3.22505600 | -2.06037200 | -2.16639100 |
| C  | 0.46246300  | 2.39700900  | -0.24780200 |
| O  | -0.78851000 | 2.36690200  | -0.40434000 |
| O  | 1.13199700  | 1.36618700  | 0.07212900  |
| C  | 1.16535400  | 3.70802100  | -0.44995400 |
| H  | 1.66911200  | 4.00406500  | 0.47807300  |
| H  | 1.93800800  | 3.60092600  | -1.22076800 |
| H  | 0.46144400  | 4.48851100  | -0.74486500 |
| C  | 4.05401800  | 0.38873500  | 0.89328800  |
| C  | 3.73890800  | 1.63843100  | 0.33486000  |
| C  | 3.92629100  | 0.21516500  | 2.37078700  |
| H  | 4.92544100  | 0.13037800  | 2.82044300  |
| H  | 3.42348500  | 1.07333500  | 2.82683000  |
| H  | 3.37671400  | -0.69663500 | 2.63057900  |
| C  | 4.66382500  | -2.05835100 | 0.54522000  |
| C  | 4.40529500  | -0.74268600 | 0.12861500  |
| H  | 4.61800500  | -2.40924700 | 1.56983300  |
| C  | 4.99301200  | -2.81496200 | -0.57767900 |
| N  | 4.58434700  | -0.73095700 | -1.24984700 |
| C  | 4.92999800  | -1.96047300 | -1.67482600 |
| H  | 5.25170800  | -3.86554700 | -0.60899300 |

|   |            |             |             |
|---|------------|-------------|-------------|
| H | 5.11183700 | -2.15830500 | -2.72392500 |
| H | 4.46504300 | 0.07061000  | -1.85514400 |
| H | 3.81299100 | 2.49023600  | 1.01659600  |
| H | 4.07806800 | 1.86482200  | -0.67935700 |
| H | 2.41682900 | 1.52182100  | 0.20554300  |

### 13

E (M06/BS1) = -327.067704 au

H(M06/BS1) = -326.902916 au

G(M06/BS1) = -326.944431 au

E(M06/BS2//M06/BS1) = -327.191772 au

E(M06-D3/BS2//M06/BS1) = -327.193396 au

|   |             |             |             |
|---|-------------|-------------|-------------|
| C | -1.29104200 | 0.01270600  | -0.00296900 |
| C | -2.05943700 | -1.25525200 | 0.00062900  |
| C | -2.09955500 | 1.25483300  | -0.00067700 |
| H | -2.63257000 | 1.33410400  | -0.95948700 |
| H | -2.87656600 | 1.18782900  | 0.77258400  |
| H | -1.52082200 | 2.16759900  | 0.15330700  |
| C | 0.96376200  | 1.17732600  | 0.00419700  |
| C | 0.07685500  | 0.05506400  | -0.00005000 |
| H | 0.65516200  | 2.21549100  | 0.00495700  |
| C | 2.25425700  | 0.71089900  | 0.00112900  |
| N | 0.90847500  | -1.07722700 | -0.00488400 |
| C | 2.18009400  | -0.69867300 | -0.00120600 |
| H | 3.16827200  | 1.28962800  | 0.00085200  |
| H | 2.98330300  | -1.42610200 | 0.00079900  |
| H | 0.60096900  | -2.04286300 | 0.00500000  |
| H | -2.88506200 | -1.19199600 | -0.71962100 |
| H | -1.47549600 | -2.15220700 | -0.21940900 |
| H | -2.52611500 | -1.38230800 | 0.98888700  |

### TS<sub>13-14</sub>

E (M06/BS1) = -537.0780351 au

H(M06/BS1) = -536.824291 au

G(M06/BS1) = -536.874618 au

E(M06/BS2//M06/BS1) = -537.2826119 au

E(M06-D3/BS2//M06/BS1) = -537.2877039 au

|   |             |             |             |
|---|-------------|-------------|-------------|
| C | -0.49123600 | 1.28975400  | 0.09599300  |
| C | -0.82948700 | 2.13890400  | -1.09476700 |
| H | -0.57521500 | 1.68091500  | -2.05574400 |
| H | -1.89687700 | 2.38617100  | -1.11149000 |
| H | -0.28041600 | 3.08922800  | -1.01311100 |
| C | -1.91841600 | -0.33625600 | -0.21300400 |
| C | -1.34293400 | -0.97539100 | -1.33341300 |
| C | -0.57500600 | -2.03347200 | -0.87467500 |
| C | -0.76007600 | -2.10180000 | 0.51282600  |
| N | -1.62835800 | -1.14427300 | 0.87827300  |
| H | -1.94543100 | -0.97959300 | 1.82567900  |

|   |             |             |             |
|---|-------------|-------------|-------------|
| H | -2.80124500 | 0.29466400  | -0.19317700 |
| H | -1.43434300 | -0.63001300 | -2.35718700 |
| H | 0.06636900  | -2.68513000 | -1.45484000 |
| H | -0.34057900 | -2.78984800 | 1.23677400  |
| C | -1.05526300 | 1.80837200  | 1.38768600  |
| H | -0.83892500 | 1.17085100  | 2.24994200  |
| H | -0.59420300 | 2.78814700  | 1.58324700  |
| H | -2.13697400 | 1.97190100  | 1.32337300  |
| C | 1.40968600  | -0.01974300 | 1.21185800  |
| C | 2.64005000  | -0.49935000 | 0.75069200  |
| H | 1.02107500  | -0.11345600 | 2.21951200  |
| C | 2.73558100  | -0.14380900 | -0.58607700 |
| H | 1.45718000  | 0.92247300  | -1.85733800 |
| H | 3.38307700  | -1.04622700 | 1.31671000  |
| H | 3.53141600  | -0.31349900 | -1.30053000 |
| C | 0.76886100  | 0.64442500  | 0.14962300  |
| N | 1.61329000  | 0.51907500  | -0.94288400 |

## 14

E (M06/BS1) = -537.0937949 au

H(M06/BS1) = -536.838242 au

G(M06/BS1) = -536.889391 au

E(M06/BS2//M06/BS1) = -537.2976511 au

E(M06-D3/BS2//M06/BS1) = -537.3022084 au

|   |             |             |             |
|---|-------------|-------------|-------------|
| C | 0.10420500  | 0.92990400  | 0.19690200  |
| C | 0.52759100  | 0.96295300  | 1.66390000  |
| H | 0.68641300  | -0.03903400 | 2.08558000  |
| H | 1.46193300  | 1.52449900  | 1.78518000  |
| H | -0.23910500 | 1.47046800  | 2.26282800  |
| C | 1.14062400  | 0.10424900  | -0.64487100 |
| C | 2.57527300  | 0.42490200  | -0.46729700 |
| C | 3.25668400  | -0.68018200 | -0.08260400 |
| C | 2.30517600  | -1.74617400 | -0.00199300 |
| N | 1.11464500  | -1.31368300 | -0.31490700 |
| H | 0.26578500  | -1.87390700 | -0.33819900 |
| H | 0.85894500  | 0.20840400  | -1.70651100 |
| H | 2.98817800  | 1.41429500  | -0.63627100 |
| H | 4.31366200  | -0.77852000 | 0.12880000  |
| H | 2.48162600  | -2.78236000 | 0.27055500  |
| C | 0.08481400  | 2.35180000  | -0.36422700 |
| H | -0.19937600 | 2.36948200  | -1.42369900 |
| H | -0.64773100 | 2.94994700  | 0.19071900  |
| H | 1.06388700  | 2.83812700  | -0.26130400 |
| C | -2.04306400 | 0.21736300  | -1.11308900 |
| C | -3.16967000 | -0.58385000 | -0.79716800 |
| H | -1.84059500 | 0.69549500  | -2.06650300 |
| C | -3.02388000 | -0.99648500 | 0.50594200  |
| H | -1.52526800 | -0.58007100 | 1.93535800  |
| H | -3.99738500 | -0.82759000 | -1.45254200 |

|   |             |             |            |
|---|-------------|-------------|------------|
| H | -3.65961300 | -1.60340200 | 1.13781900 |
| C | -1.23934000 | 0.28112100  | 0.00851100 |
| N | -1.84633700 | -0.48338000 | 0.98121500 |

## 15

E (M06/BS1) = -824.8298689 au

H(M06/BS1) = -824.650044 au

G(M06/BS1) = -824.705736 au

E(M06/BS2//M06/BS1) = -825.3382711 au

E(M06-D3/BS2//M06/BS1) = -825.3404651 au

|    |             |             |             |
|----|-------------|-------------|-------------|
| Au | -0.15395400 | -0.24711700 | 0.00303000  |
| P  | 2.09444500  | 0.16247500  | -0.00083700 |
| C  | 2.49775800  | 1.93326800  | 0.14626700  |
| H  | 3.58542400  | 2.07973800  | 0.12803400  |
| H  | 2.04163000  | 2.48199300  | -0.68525900 |
| H  | 2.09290600  | 2.32563200  | 1.08575900  |
| C  | 3.01613400  | -0.63254400 | 1.35464400  |
| H  | 2.89311400  | -1.71963900 | 1.29682300  |
| H  | 4.08262500  | -0.38228700 | 1.28548100  |
| H  | 2.62318600  | -0.28653200 | 2.31718700  |
| C  | 2.94852800  | -0.37584600 | -1.51777800 |
| H  | 4.01580900  | -0.12504500 | -1.46277200 |
| H  | 2.83502400  | -1.45863400 | -1.64027000 |
| H  | 2.50135400  | 0.12261200  | -2.38503400 |
| C  | -2.95349400 | 0.34597600  | -0.00148000 |
| O  | -2.20718200 | -0.71413800 | -0.00478200 |
| O  | -2.53696000 | 1.50535800  | 0.00597500  |
| C  | -4.43538100 | 0.04098600  | -0.00700100 |
| H  | -4.69774200 | -0.55812100 | 0.87317300  |
| H  | -5.02374200 | 0.96279500  | -0.00862800 |
| H  | -4.69200600 | -0.55820600 | -0.88873900 |

## TS<sub>14-12</sub>

E (M06/BS1) = -1361.935809 au

H(M06/BS1) = -1361.502734 au

G(M06/BS1) = -1361.586289 au

E(M06/BS2//M06/BS1) = -1362.642814 au

E(M06-D3/BS2//M06/BS1) = -1362.655776 au

|    |            |             |             |
|----|------------|-------------|-------------|
| Au | 1.65582700 | -1.01007500 | -0.03064900 |
| P  | 2.99144200 | 0.79677700  | 0.39116200  |
| C  | 2.05811500 | 2.12468500  | 1.21791800  |
| H  | 2.71037100 | 2.98999100  | 1.39461800  |
| H  | 1.21329800 | 2.42558200  | 0.58325700  |
| H  | 1.67379600 | 1.75841900  | 2.17697100  |
| C  | 4.41200900 | 0.46424700  | 1.47851100  |
| H  | 5.07218000 | -0.27453600 | 1.01131700  |
| H  | 4.97294200 | 1.39020900  | 1.65949600  |
| H  | 4.05535900 | 0.06256000  | 2.43338200  |

|   |             |             |             |
|---|-------------|-------------|-------------|
| C | 3.69290600  | 1.57775500  | -1.09560600 |
| H | 4.29801700  | 2.44797500  | -0.81033500 |
| H | 4.31794200  | 0.86072700  | -1.63854900 |
| H | 2.87267000  | 1.90287900  | -1.74636500 |
| C | -0.85856400 | -2.39388000 | -0.13756300 |
| O | 0.32147200  | -2.66142200 | -0.49588600 |
| O | -1.11330900 | -1.41241000 | 0.62834200  |
| C | -1.97974700 | -3.22899500 | -0.67988800 |
| H | -1.65534300 | -4.26088100 | -0.83935800 |
| H | -2.84958600 | -3.20216000 | -0.01491000 |
| H | -2.27723300 | -2.82139000 | -1.65640000 |
| C | -2.50011600 | 1.51773200  | 0.64460500  |
| C | -3.57820400 | 2.61197600  | 0.69660700  |
| H | -4.10155800 | 2.70723000  | -0.26350300 |
| H | -4.31681600 | 2.37652700  | 1.47363800  |
| H | -3.14912600 | 3.59081300  | 0.94960300  |
| C | -3.19341400 | 0.17238200  | 0.39822600  |
| C | -4.08795300 | -0.45947100 | 1.32206700  |
| C | -5.09143400 | -1.10217000 | 0.62249100  |
| C | -4.89077000 | -0.80667300 | -0.73375600 |
| N | -3.81414900 | -0.03582500 | -0.86024500 |
| H | -3.44284900 | 0.32487300  | -1.73411500 |
| H | -2.24943200 | -0.73576500 | 0.49774400  |
| H | -3.92961600 | -0.48575600 | 2.39547300  |
| H | -5.87661500 | -1.73191500 | 1.02091900  |
| H | -5.44918800 | -1.14311400 | -1.59999500 |
| C | -1.76816000 | 1.46412600  | 1.99252200  |
| H | -1.00520100 | 0.67502600  | 2.00111700  |
| H | -1.27061900 | 2.42425200  | 2.18211600  |
| H | -2.46991400 | 1.29085900  | 2.81959000  |
| C | -0.88489900 | 0.98356100  | -1.38851500 |
| C | 0.01164300  | 1.78296400  | -2.14851800 |
| H | -1.03725100 | -0.08248600 | -1.50758100 |
| C | -0.08188000 | 3.06604000  | -1.66791200 |
| H | -1.27530900 | 3.88572200  | -0.12796900 |
| H | 0.63785200  | 1.44818100  | -2.96842800 |
| H | 0.41209100  | 3.98140900  | -1.96849100 |
| C | -1.50991900 | 1.79781900  | -0.46251100 |
| N | -1.00381800 | 3.06398600  | -0.65134800 |

## 17

E (M06/BS1) = -805.856189 au

H(M06/BS1) = -805.656292 au

G(M06/BS1) = -805.711070 au

E(M06/BS2//M06/BS1) = -806.351293 au

E(M06-D3/BS2//M06/BS1) = -806.353648 au

|    |             |             |             |
|----|-------------|-------------|-------------|
| Au | -0.04089400 | -0.01968400 | -0.00027500 |
| P  | 2.33787700  | 0.00913800  | 0.00091700  |
| C  | 3.12344800  | -0.44302800 | 1.58815600  |
| H  | 4.21703600  | -0.38793300 | 1.50731200  |

|   |             |             |             |
|---|-------------|-------------|-------------|
| H | 2.78262900  | 0.24174700  | 2.37300300  |
| H | 2.83197900  | -1.46211700 | 1.86663200  |
| C | 3.13455900  | -1.11121100 | -1.20339400 |
| H | 2.81124500  | -0.85038600 | -2.21759200 |
| H | 4.22754100  | -1.03035500 | -1.13903500 |
| H | 2.83625400  | -2.14582000 | -0.99966900 |
| C | 3.07225900  | 1.63784700  | -0.38530500 |
| H | 4.16851500  | 1.58194500  | -0.36364300 |
| H | 2.74574600  | 1.96222100  | -1.37989900 |
| H | 2.73285400  | 2.37728900  | 0.34897800  |
| C | -2.08771200 | -0.06641200 | -0.00039700 |
| C | -2.96791800 | -1.14328800 | 0.00107100  |
| C | -4.30152600 | -0.65285300 | 0.00167400  |
| H | -2.66946900 | -2.18802600 | 0.00174400  |
| H | -5.21702500 | -1.23556500 | 0.00280600  |
| H | -4.99630600 | 1.48068800  | 0.00035800  |
| H | -2.54590700 | 2.00683600  | -0.00150000 |
| N | -2.89483300 | 1.05901300  | -0.00068400 |
| C | -4.22291000 | 0.72133400  | 0.00040600  |

## 18

E (M06/BS1) = -904.013281 au

H(M06/BS1) = -903.781724 au

G(M06/BS1) = -903.845151 au

E(M06/BS2//M06/BS1) = -904.542003 au

E(M06-D3/BS2//M06/BS1) = -904.544970 au

|    |             |             |             |
|----|-------------|-------------|-------------|
| Au | -0.32309300 | 0.00070300  | 0.00027600  |
| P  | 2.03342700  | -0.00046500 | -0.00024400 |
| C  | 2.79807900  | 1.11086900  | 1.23025500  |
| H  | 3.89267700  | 1.05244500  | 1.17069400  |
| H  | 2.47938900  | 2.14250200  | 1.04269300  |
| H  | 2.47264500  | 0.82434000  | 2.23658700  |
| C  | 2.79517800  | -1.62360400 | 0.34696600  |
| H  | 2.46758300  | -2.35100700 | -0.40425500 |
| H  | 3.89017500  | -1.54622000 | 0.32493200  |
| H  | 2.47544400  | -1.97576500 | 1.33410900  |
| C  | 2.79892700  | 0.50922700  | -1.57795500 |
| H  | 3.89354000  | 0.48468100  | -1.49701600 |
| H  | 2.47899400  | -0.16785400 | -2.37793300 |
| H  | 2.47680800  | 1.52510900  | -1.83243600 |
| C  | -3.56585200 | 0.00002300  | -0.00020600 |
| C  | -2.34123600 | -0.00046300 | 0.00039600  |
| C  | -5.02201300 | -0.00131500 | -0.00128300 |
| H  | -5.42627700 | -0.54797400 | -0.86421500 |
| H  | -5.42753800 | -0.47551700 | 0.90267100  |
| H  | -5.42900800 | 1.01826900  | -0.04304200 |

## 17'

E (M06/BS1) = -805.851901 au



H(M06/BS1) = -805.652083 au

G(M06/BS1) = -805.707107 au

E(M06/BS2//M06/BS1) = -806.346605 au

E(M06-D3/BS2//M06/BS1) = -806.348994 au

|    |             |             |             |
|----|-------------|-------------|-------------|
| Au | -0.03292300 | -0.00981200 | -0.00142400 |
| P  | 2.35108600  | 0.00458700  | 0.00119400  |
| C  | 3.13356100  | -0.44341100 | 1.59213400  |
| H  | 4.22771000  | -0.39772100 | 1.51225900  |
| H  | 2.79763500  | 0.24858100  | 2.37281200  |
| H  | 2.83367100  | -1.45840200 | 1.87685900  |
| C  | 3.14504200  | -1.13152500 | -1.19147900 |
| H  | 2.82693600  | -0.87759500 | -2.20912600 |
| H  | 4.23850400  | -1.05851700 | -1.12477700 |
| H  | 2.83844000  | -2.16224400 | -0.97995700 |
| C  | 3.10650700  | 1.62221100  | -0.39482300 |
| H  | 4.20210200  | 1.55487700  | -0.36848700 |
| H  | 2.78742900  | 1.94276500  | -1.39310800 |
| H  | 2.77228800  | 2.37112100  | 0.33225500  |
| C  | -2.08114000 | -0.01686200 | -0.00084700 |
| C  | -2.91039100 | 1.09297100  | -0.00019100 |
| C  | -2.96857400 | -1.14538200 | 0.00120700  |
| N  | -4.22142300 | 0.68192900  | 0.00208000  |
| C  | -4.26622400 | -0.68910100 | 0.00290700  |
| H  | -2.67565300 | -2.19149100 | 0.00145300  |
| H  | -5.21464600 | -1.21364100 | 0.00475900  |
| H  | -5.02820300 | 1.28976500  | 0.00275400  |
| H  | -2.67432000 | 2.15189400  | -0.00111000 |

### LAuOH

E (M06/BS1) = -672.231395 au

H(M06/BS1) = -672.093572 au

G(M06/BS1) = -672.141902 au

E(M06/BS2//M06/BS1) = -672.685540 au

E(M06-D3/BS2//M06/BS1) = -672.687074 au

|    |             |             |             |
|----|-------------|-------------|-------------|
| Au | 0.76600600  | -0.00046600 | -0.00008900 |
| P  | -1.52785700 | 0.00185800  | -0.00020500 |
| C  | -2.28436300 | 1.65745900  | -0.10870200 |
| H  | -3.37923800 | 1.57847500  | -0.09816300 |
| H  | -1.95678100 | 2.26800200  | 0.74024400  |
| H  | -1.96432300 | 2.14724700  | -1.03528300 |
| C  | -2.28045200 | -0.92213600 | -1.38169100 |
| H  | -1.95014300 | -1.96651900 | -1.34803500 |
| H  | -3.37578400 | -0.88507900 | -1.31863200 |
| H  | -1.95517700 | -0.48547300 | -2.33276500 |
| C  | -2.28115200 | -0.73224300 | 1.49065600  |
| H  | -3.37622500 | -0.70809500 | 1.41881400  |
| H  | -1.94618800 | -1.76989200 | 1.59901300  |
| H  | -1.96218000 | -0.16946600 | 2.37533300  |
| O  | 2.78178600  | -0.10383100 | 0.00480200  |

H 3.09094900 0.81190400 -0.03037600

**17"**

E (M06/BS1) = -805.863634 au

H(M06/BS1) = -805.664663 au

G(M06/BS1) = -805.719392 au

E(M06/BS2//M06/BS1) = -806.361442 au

E(M06-D3/BS2//M06/BS1) = -806.363795 au

|    |             |             |             |
|----|-------------|-------------|-------------|
| Au | 0.03002800  | 0.00061800  | -0.00021200 |
| P  | -2.28422700 | -0.00120400 | 0.00005500  |
| C  | -3.03494200 | -0.91378400 | 1.38910200  |
| H  | -4.13000000 | -0.86593600 | 1.32879400  |
| H  | -2.71521200 | -1.96137300 | 1.35718500  |
| H  | -2.70307700 | -0.47713200 | 2.33765500  |
| C  | -3.03190200 | 1.65886500  | 0.09723500  |
| H  | -2.70352300 | 2.26260600  | -0.75605400 |
| H  | -4.12689300 | 1.58228200  | 0.08776000  |
| H  | -2.71041400 | 2.15428900  | 1.02012500  |
| C  | -3.03815900 | -0.74512300 | -1.48470200 |
| H  | -4.13286500 | -0.70652000 | -1.41382000 |
| H  | -2.71214700 | -0.19757200 | -2.37605700 |
| H  | -2.71615500 | -1.78810400 | -1.57858800 |
| C  | 4.22358000  | 0.70768400  | 0.00058400  |
| C  | 2.89992200  | 1.10366600  | 0.00062900  |
| H  | 5.09077800  | 1.36122300  | 0.00109100  |
| C  | 4.22214500  | -0.71149200 | -0.00033900 |
| N  | 2.08466800  | 0.00029800  | -0.00022000 |
| C  | 2.89769400  | -1.10474300 | -0.00079200 |
| H  | 5.08799200  | -1.36682900 | -0.00070700 |
| H  | 2.46786400  | -2.10249000 | -0.00149500 |
| H  | 2.47211300  | 2.10227500  | 0.00128500  |

**TS<sub>9,6</sub>**

E (M06/BS1) = -1039.501868 au

H(M06/BS1) = -1039.162189 au

G(M06/BS1) = -1039.239386 au

E(M06/BS2//M06/BS1) = -1040.085659 au

E(M06-D3/BS2//M06/BS1) = -1040.093563 au

|    |             |             |             |
|----|-------------|-------------|-------------|
| Au | -0.90650300 | -0.02957000 | -0.20636800 |
| P  | 0.09254700  | 2.08269100  | 0.00347800  |
| C  | 1.25134600  | 2.47117200  | -1.34890000 |
| H  | 1.66576800  | 3.47874100  | -1.21353800 |
| H  | 2.06831500  | 1.73893900  | -1.33434000 |
| H  | 0.73850000  | 2.41485100  | -2.31543200 |
| C  | -1.06299900 | 3.49227400  | 0.04684000  |
| H  | -1.73669900 | 3.39033900  | 0.90470600  |
| H  | -0.50598700 | 4.43464800  | 0.13177800  |
| H  | -1.66270200 | 3.50685500  | -0.86991600 |

|   |             |             |             |
|---|-------------|-------------|-------------|
| C | 1.09993700  | 2.26026200  | 1.51166900  |
| H | 1.50173700  | 3.28039800  | 1.57183400  |
| H | 0.48946500  | 2.05844800  | 2.39858800  |
| H | 1.93336800  | 1.54615300  | 1.48293100  |
| C | 1.18036400  | -1.75444400 | -0.92600700 |
| C | 0.04440000  | -2.36602300 | -0.47822600 |
| C | 1.38997900  | -1.53514100 | -2.39520900 |
| H | 2.27215700  | -2.08879000 | -2.74378500 |
| H | 0.52185500  | -1.87017500 | -2.97244000 |
| H | 1.56535500  | -0.47496300 | -2.62261000 |
| C | 3.41594700  | -0.62648400 | -0.37173100 |
| C | 2.23851100  | -1.29157300 | -0.05323600 |
| H | 3.75139800  | -0.38667500 | -1.37522900 |
| C | 4.09427100  | -0.33804400 | 0.83263500  |
| N | 2.20658000  | -1.40464400 | 1.32150600  |
| C | 3.31931800  | -0.83229200 | 1.86217200  |
| H | 5.04861500  | 0.16296500  | 0.93988300  |
| H | 3.47939400  | -0.83098500 | 2.93295000  |
| H | 1.46667900  | -1.83638000 | 1.85866700  |
| H | -0.66768800 | -2.78200600 | -1.18925800 |
| H | -0.09283200 | -2.66332000 | 0.56261000  |
| C | -3.12913900 | -1.28953900 | 0.64467100  |
| C | -3.12307600 | -1.15040900 | -0.56675500 |
| H | -3.27439600 | -1.10791400 | -1.62843500 |
| C | -3.12132000 | -1.45929700 | 2.08623300  |
| H | -3.12240400 | -0.48967100 | 2.59841800  |
| H | -4.00995200 | -2.01600500 | 2.40729000  |
| H | -2.23575300 | -2.02008600 | 2.41077200  |

### TS<sub>6-13</sub>

E (M06/BS1) = -1039.480848 au

H(M06/BS1) = -1039.145256 au

G(M06/BS1) = -1039.221617 au

E(M06/BS2//M06/BS1) = -1040.061742 au

E(M06-D3/BS2//M06/BS1) = -1040.069186 au

|    |             |             |             |
|----|-------------|-------------|-------------|
| Au | 0.05622100  | 0.80622400  | 0.00386700  |
| P  | -2.28891700 | 0.80280100  | 0.14210800  |
| C  | -3.00222200 | -0.24255900 | 1.45434400  |
| H  | -4.09310100 | -0.12315900 | 1.47974600  |
| H  | -2.75918700 | -1.29274800 | 1.25847800  |
| H  | -2.58163000 | 0.04230100  | 2.42524300  |
| C  | -2.96510400 | 2.46386300  | 0.47223000  |
| H  | -2.65512500 | 3.15162900  | -0.32239200 |
| H  | -4.06132700 | 2.42678900  | 0.51360100  |
| H  | -2.57867900 | 2.83683300  | 1.42731400  |
| C  | -3.13091900 | 0.26382700  | -1.38214900 |
| H  | -4.21961700 | 0.31891300  | -1.25354600 |
| H  | -2.83053200 | 0.90707400  | -2.21670300 |
| H  | -2.84216000 | -0.76805800 | -1.61309900 |

|   |             |             |             |
|---|-------------|-------------|-------------|
| C | 1.85274300  | -2.10372300 | 0.76772800  |
| C | 3.00497500  | -1.59944000 | 0.17819500  |
| C | 1.70095700  | -2.02091400 | 2.25056700  |
| H | 1.28142900  | -2.94288700 | 2.67004000  |
| H | 2.65891800  | -1.81896800 | 2.73842300  |
| H | 1.00670600  | -1.20339600 | 2.50539200  |
| C | -0.56395100 | -2.85475400 | 0.46401200  |
| C | 0.71201900  | -2.48407000 | 0.01671100  |
| H | -0.86299000 | -2.92028200 | 1.50473800  |
| C | -1.35595400 | -3.13283500 | -0.65426900 |
| N | 0.66882500  | -2.54462300 | -1.37024800 |
| C | -0.55980000 | -2.92741900 | -1.77523200 |
| H | -2.38970700 | -3.45718400 | -0.66235600 |
| H | -0.79202000 | -3.03589400 | -2.82736200 |
| H | 1.43619000  | -2.33413500 | -1.99518700 |
| H | 3.88947300  | -1.47510300 | 0.80340400  |
| H | 3.21859300  | -1.78136800 | -0.87678300 |
| H | 2.54963100  | -0.25534100 | 0.07162200  |
| C | 2.11824400  | 1.01312000  | -0.15270600 |
| C | 2.98814200  | 1.86522600  | -0.38169100 |
| C | 4.02509700  | 2.83697500  | -0.64497400 |
| H | 4.72116100  | 2.92484300  | 0.19846700  |
| H | 4.59490700  | 2.58838600  | -1.54897300 |
| H | 3.57422000  | 3.82660200  | -0.80203600 |

### TS<sub>14-6</sub>

E(M06/BS1) = -1249.518289 au

H(M06/BS1) = -1249.093912 au

G(M06/BS1) = -1249.175625 au

E(M06/BS2//M06/BS1) = -1250.180867 au

E(M06-D3/BS2//M06/BS1) = -1250.192868 au

|    |             |             |             |
|----|-------------|-------------|-------------|
| Au | 0.92513800  | -1.01224700 | -0.04258100 |
| P  | 3.02724900  | -0.05244100 | 0.34811200  |
| C  | 3.47279800  | 0.03441000  | 2.11485900  |
| H  | 4.44327200  | 0.53234300  | 2.23851100  |
| H  | 2.70575100  | 0.59879300  | 2.65809500  |
| H  | 3.52746300  | -0.97551500 | 2.53597800  |
| C  | 4.46145300  | -0.84750600 | -0.44668100 |
| H  | 4.31696500  | -0.86929300 | -1.53231100 |
| H  | 5.37804400  | -0.29089000 | -0.21286000 |
| H  | 4.56111600  | -1.87690400 | -0.08519300 |
| C  | 3.08124000  | 1.68206200  | -0.21020600 |
| H  | 4.04739500  | 2.13832800  | 0.04149500  |
| H  | 2.92212600  | 1.72737000  | -1.29365600 |
| H  | 2.26946200  | 2.24185600  | 0.27265500  |
| C  | -1.69249600 | 1.71904900  | 0.82039800  |
| C  | -2.70577400 | 2.82422800  | 1.17221200  |
| H  | -3.37444700 | 3.03747000  | 0.32879500  |
| H  | -3.31612100 | 2.52120500  | 2.03329000  |
| H  | -2.19616800 | 3.75813100  | 1.44376600  |

|   |             |             |             |
|---|-------------|-------------|-------------|
| C | -2.46671200 | 0.42617400  | 0.59102600  |
| C | -3.08336600 | -0.36499400 | 1.61599000  |
| C | -4.17368100 | -1.01710400 | 1.08006400  |
| C | -4.31896300 | -0.55032300 | -0.23707800 |
| N | -3.38279500 | 0.36217900  | -0.48525200 |
| H | -3.23103200 | 0.82119200  | -1.37811100 |
| H | -1.65358900 | -0.58282800 | 0.21610900  |
| H | -2.66150200 | -0.51360400 | 2.60448100  |
| H | -4.79929000 | -1.76232300 | 1.55487100  |
| H | -5.04092200 | -0.83915500 | -0.99283600 |
| C | -0.73876300 | 1.53062700  | 2.00759000  |
| H | -0.06467900 | 0.67386900  | 1.85767200  |
| H | -0.11816900 | 2.42577400  | 2.14206000  |
| H | -1.29394200 | 1.37682700  | 2.94224200  |
| C | -0.70745500 | 1.45435200  | -1.63059000 |
| C | 0.07416400  | 2.31130100  | -2.45292500 |
| H | -1.03782800 | 0.45440200  | -1.89248000 |
| C | 0.30791600  | 3.45812500  | -1.73754200 |
| H | -0.30638100 | 4.03630300  | 0.19945500  |
| H | 0.41865900  | 2.10319400  | -3.45908600 |
| H | 0.85216400  | 4.35967800  | -1.98854900 |
| C | -0.93009600 | 2.10009400  | -0.42731800 |
| N | -0.30032000 | 3.32093500  | -0.51547200 |
| C | -0.97383100 | -1.76501300 | -0.36570100 |
| C | -1.82265100 | -2.56362000 | -0.77835300 |
| C | -2.77905300 | -3.54292600 | -1.26400100 |
| H | -3.39768400 | -3.14506900 | -2.07820600 |
| H | -2.24627900 | -4.42057800 | -1.65440300 |
| H | -3.44562900 | -3.89184300 | -0.46494500 |

### 15'

E (M06/BS1) = -1122.478402 au

H(M06/BS1) = -1122.319032 au

G(M06/BS1) = -1122.381024 au

E(M06/BS2//M06/BS1) = -1123.116104 au

E(M06-D3/BS2//M06/BS1) = -1123.118312 au

|    |             |             |             |
|----|-------------|-------------|-------------|
| Au | -0.15395400 | -0.24711700 | 0.00303000  |
| P  | 2.09444500  | 0.16247500  | -0.00083700 |
| C  | 2.49775800  | 1.93326800  | 0.14626700  |
| H  | 3.58542400  | 2.07973800  | 0.12803400  |
| H  | 2.04163000  | 2.48199300  | -0.68525900 |
| H  | 2.09290600  | 2.32563200  | 1.08575900  |
| C  | 3.01613400  | -0.63254400 | 1.35464400  |
| H  | 2.89311400  | -1.71963900 | 1.29682300  |
| H  | 4.08262500  | -0.38228700 | 1.28548100  |
| H  | 2.62318600  | -0.28653200 | 2.31718700  |
| C  | 2.94852800  | -0.37584600 | -1.51777800 |
| H  | 4.01580900  | -0.12504500 | -1.46277200 |
| H  | 2.83502400  | -1.45863400 | -1.64027000 |
| H  | 2.50135400  | 0.12261200  | -2.38503400 |

|   |             |             |             |
|---|-------------|-------------|-------------|
| C | -2.95349400 | 0.34597600  | -0.00148000 |
| O | -2.20718200 | -0.71413800 | -0.00478200 |
| O | -2.53696000 | 1.50535800  | 0.00597500  |
| C | -4.43538100 | 0.04098600  | -0.00700100 |
| H | -4.69774200 | -0.55812100 | 0.87317300  |
| H | -5.02374200 | 0.96279500  | -0.00862800 |
| H | -4.69200600 | -0.55820600 | -0.88873900 |

TFA

E (M06/BS1) = -526.595429 au

H(M06/BS1) = -526.548512 au

G(M06/BS1) = -526.586668 au

E(M06/BS2//M06/BS1) = -526.8270838 au

E(M06-D3/BS2//M06/BS1) = -526.827388 au

|   |             |             |             |
|---|-------------|-------------|-------------|
| C | 0.93399000  | 0.15589300  | 0.00022000  |
| O | 1.49374200  | 1.21754500  | -0.00006500 |
| C | -0.59552500 | 0.00141900  | -0.00002300 |
| O | 1.49478100  | -1.04488000 | -0.00004900 |
| H | 2.46432900  | -0.93207800 | -0.00008400 |
| F | -0.98938100 | -0.67322800 | -1.07783900 |
| F | -0.98965700 | -0.67042200 | 1.07945600  |
| F | -1.17688400 | 1.18885900  | -0.00163800 |

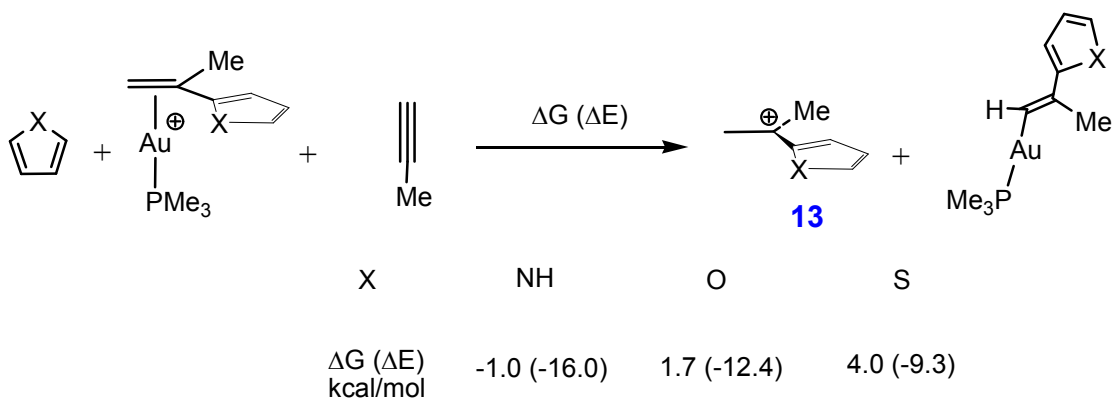

**Scheme S1.** Comparison of the stability of the carbocation **13** for different heterocycles calculated based on the reaction shown above (a part of the mechanism illustrated in Figure 4). It follows that the replacement of pyrrole by less-nucleophilic substrates, such as furan and thiophene, decreases the stability of carbocation **13** by about 2.0-5.0 kcal/mol.

## Computational details

Gaussian 09<sup>S1</sup> was used to fully optimize all the structures reported in this paper at the M06 level of density functional theory (DFT)<sup>S2</sup> in acetic acid using the CPCM<sup>S3</sup> solvation model. The effective-core potential of Hay and Wadt with a double- $\xi$  valence basis set (LANL2DZ)<sup>S4</sup> was chosen to describe Au. The 6-31G(d) basis set was used for other atoms.<sup>S5</sup> A Polarization function of  $\xi_f = 1.050$  was also added for Au.<sup>S6</sup> This basis set combination will be referred to as BS1. Frequency calculations were carried out at the same level of theory as those for the structural optimization. Transition structures were located using the Berny algorithm. Intrinsic reaction coordinate (IRC)<sup>S7</sup> calculations were used to confirm the connectivity between transition structures and minima. To further refine the energies obtained from the M06/BS1 calculations, we carried out single-point energy calculations for all of the structures with a larger basis set (BS2) in acetic acid using the CPCM solvation model. BS2 utilizes def2-TZVP for all atoms along with the effective core potential including scalar relativistic effects<sup>S8</sup> for Au. We also performed single-point energy calculations employing the D3 empirical dispersion correction by Grimme. The potential and Gibbs free energies obtained from the M06-D3/BS2//M06/BS1 calculations in acetic acid are used for interpreting the obtained results.

---

## References

(S1) Frisch, M. J.; Trucks, G. W.; Schlegel, H. B.; Scuseria, G. E.; Robb, M. A.; Cheeseman, J. R.; Scalmani, G.; Barone, V.; Mennucci, B.; Petersson, G. A.; Nakatsuji, H.; Caricato, M.; Li, X.; Hratchian, H. P.; Izmaylov, A. F.; Bloino, J.; Zheng, G.; Sonnenberg, J. L.; Hada, M.; Ehara, M.; Toyota, K.; Fukuda, R.; Hasegawa, J.; Ishida, M.; Nakajima, T.; Honda, Y.; Kitao, O.; Nakai, H.; Vreven, T.; Montgomery, J. A., Jr.; Peralta, J. E.; Ogliaro, F.; Bearpark, M.; Heyd, J. J.; Brothers, E.; Kudin, K. N.; Staroverov, V. N.; Kobayashi, R.; Normand, J.; Raghavachari, K.;



---

Rendell, A.; Burant, J. C.; Iyengar, S. S.; Tomasi, J.; Cossi, M.; Rega, N.; Millam, J. M.; Klene, M.; Knox, J. E.; Cross, J. B.; Bakken, V.; Adamo, C.; Jaramillo, J.; Gomperts, R.; Stratmann, R. E.; Yazyev, O.; Austin, A. J.; Cammi, R.; Pomelli, C.; Ochterski, J. W.; Martin, R. L.; Morokuma, K.; Zakrzewski, V. G.; Voth, G. A.; Salvador, P.; Dannenberg, J. J.; Dapprich, S.; Daniels, A. D.; Farkas, O.; Foresman, J. B.; Ortiz, J. V.; Cioslowski, J.; Fox, D. J. *Gaussian 09*, Revision D.01; Gaussian, Inc.: Wallingford, CT, **2009**.

(S2) (a) Zhao, Y.; Schultz, N. E.; Truhlar, D. G. *J. Chem. Theory Comput.* **2006**, *2*, 364. (b) Zhao, Y.; Truhlar, D. G. *J. Chem. Phys.* **2006**, *125*, No. 194101. (c) Zhao, Y.; Truhlar, D. G. *J. Phys. Chem. A* **2006**, *110*, 13126.

(S3) Barone, V.; Cossi, M. *J. Phys. Chem. A* **1998**, *102*, 1995–2001.

(S4) (a) Hay, P. J.; Wadt, W. R. *J. Chem. Phys.* **1985**, *82*, 270–283; (b) Wadt, W. R.; Hay, P. J. *J. Chem. Phys.* **1985**, *82*, 284–298.

(S5) Hariharan, P. C.; Pople, J. A. *Theor. Chim. Acta* **1973**, *28*, 213–222.

(S6) (a) Ehlers, A. W.; Böhme, M.; Dapprich, S.; Gobbi, A.; Höllwarth, A.; Jonas, V.; Köhler, K. F.; Stegmann, R.; Veldkamp, A.; Frenking, G. *Chem. Phys. Lett.* **1993**, *208*, 111–114. (b) Höllwarth, A.; Böhme, M.; Dapprich, S.; Ehlers, A. W.; Gobbi, A.; Jonas, V.; Köhler, K. F.; Stegmann, R.; Veldkamp, A.; Frenking, G. *Chem. Phys. Lett.* **1993**, *208*, 237–240.

(S7) (a) Fukui, K. *J. Phys. Chem.* **1970**, *74*, 4161–4163. (b) Fukui, K. *Acc. Chem. Res.* **1981**, *14*, 363–368.

(S8) Weigend, F.; Furche, F.; Ahlrichs, R. *J. Chem. Phys.* **2003**, *119*, 12753–12762.
